# Supplementary material
Source: HighWire-hosted journal article supplement (http://d2538ggaoe6cji.cloudfront.net/highwire/filestream/37315/field_highwire_adjunct_files/0/059360-1.pdf)
Supplement: 059360-1.pdf [file 059360-1.pdf]

## Supplementary Material

# Bayesian inference of cancer driver genes using signatures of positive selection

Luis Zapata, Hana Susak, Oliver Drechsel, Marc R. Friedländer, Xavier Estivill and Stephan Ossowski

## Supplementary Figures

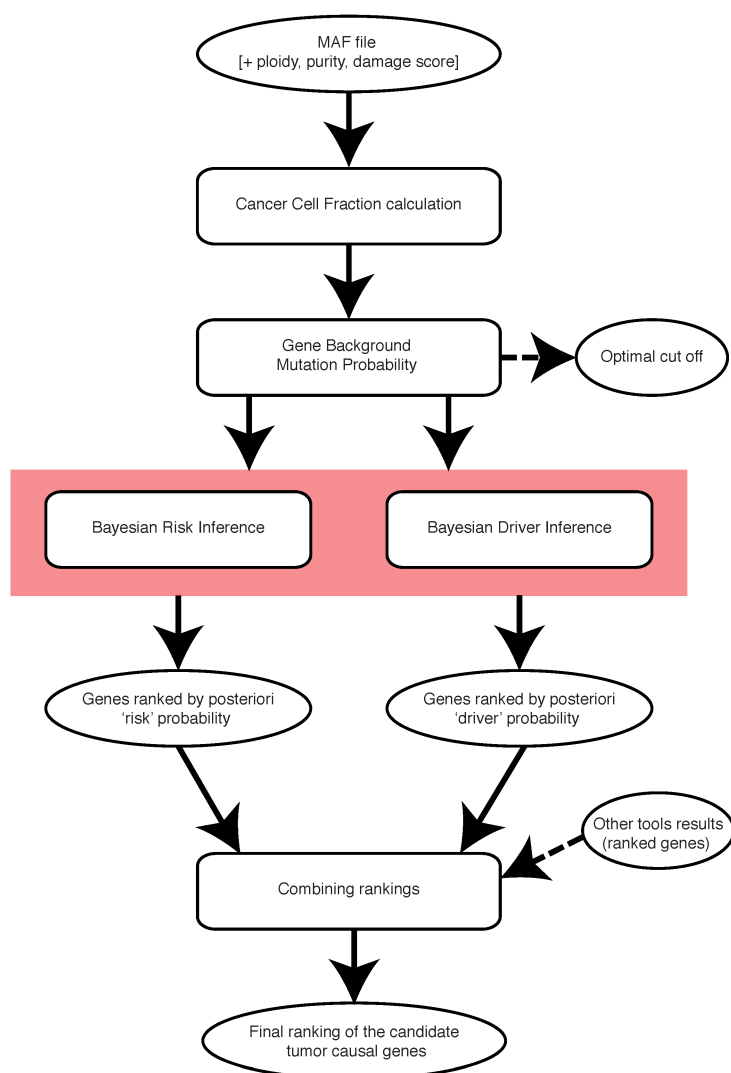

## Supplementary Figure 1

**cDriver Pipeline.** Schematic overview of cDriver's workflow. Input is a standardized MAF file with optional columns: ploidy, purity and functional impact score. In this diagram, ellipsoids represent data or files. Rectangles represent functions or operations. The first step is the calculation of cancer cell fraction. The second step calculates the background mutation

probability using the model described in online methods. The third step calculates the posterior probabilities per gene using two Bayesian models. The final output is a ranking of all genes given by the combination of the previously obtained rankings.

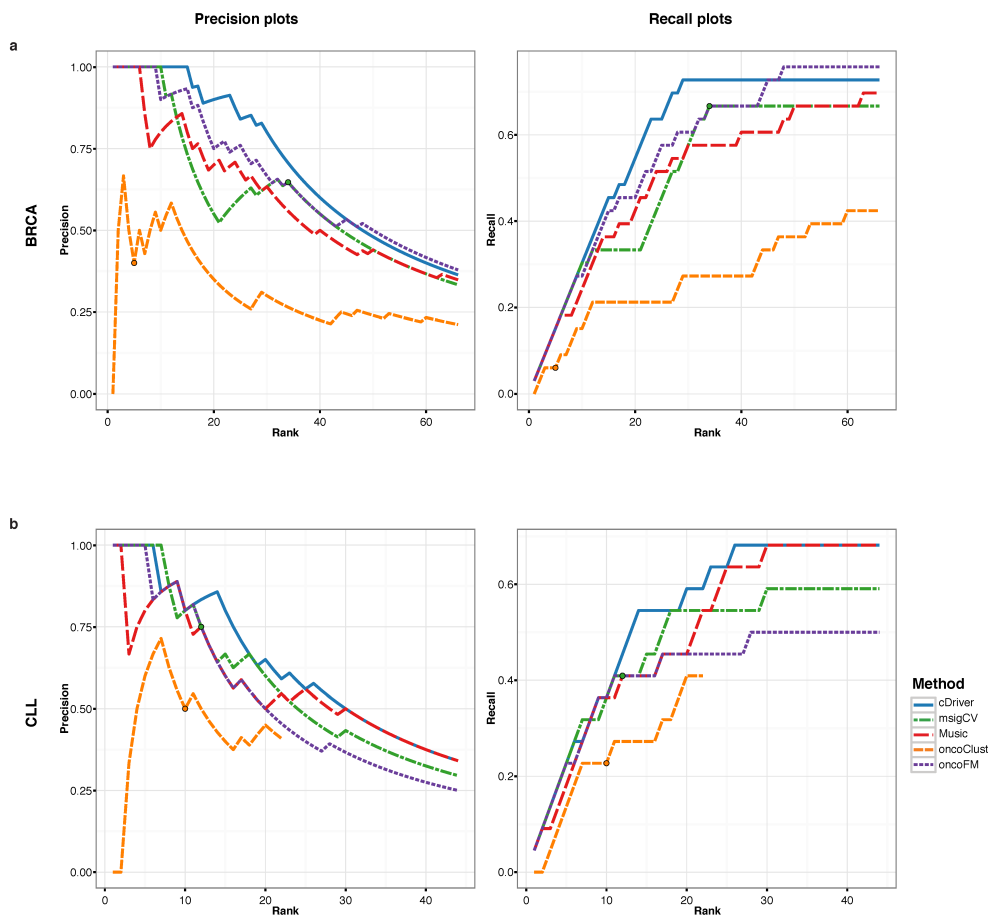

**Supplementary Figure 2**

**Precision and recall for five driver identification methods benchmarked on different datasets.** Precision and recall plots for BRCA (**a**), CLL (**b**). Precision and recall are shown for methods: cDriver (blue), MutsigCV (misgCV, green), MuSiC (red), OncodriveFM (oncoFM, purple) and OncodriveCLUST (oncoClust, orange). As gold standard, manually compiled lists of 44 genes for BRCA and 22 genes for CLL were used, while Cancer Gene Census was used for Pancan12.

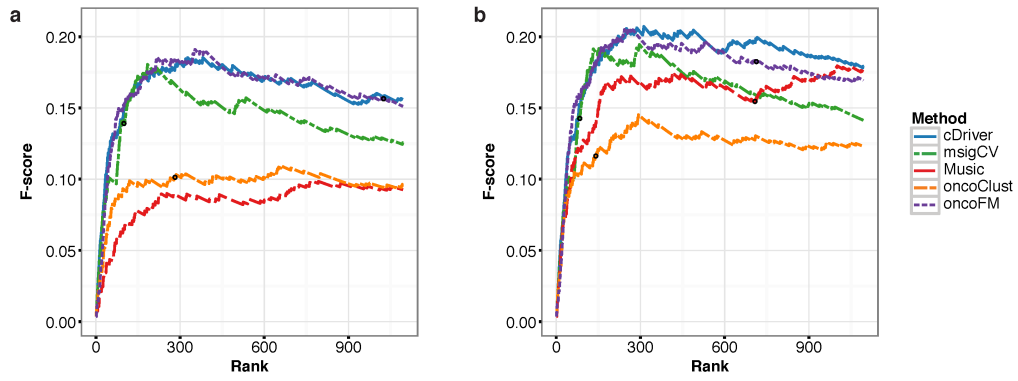

### Supplementary Figure 3

**F-score measure on filtered versus unfiltered data.** F-score curves for competing methods with and without post-filtration of non-expressed genes in the Pancan12 dataset. All methods are shown, and their corresponding significance threshold ranking using Q value < 0.1.

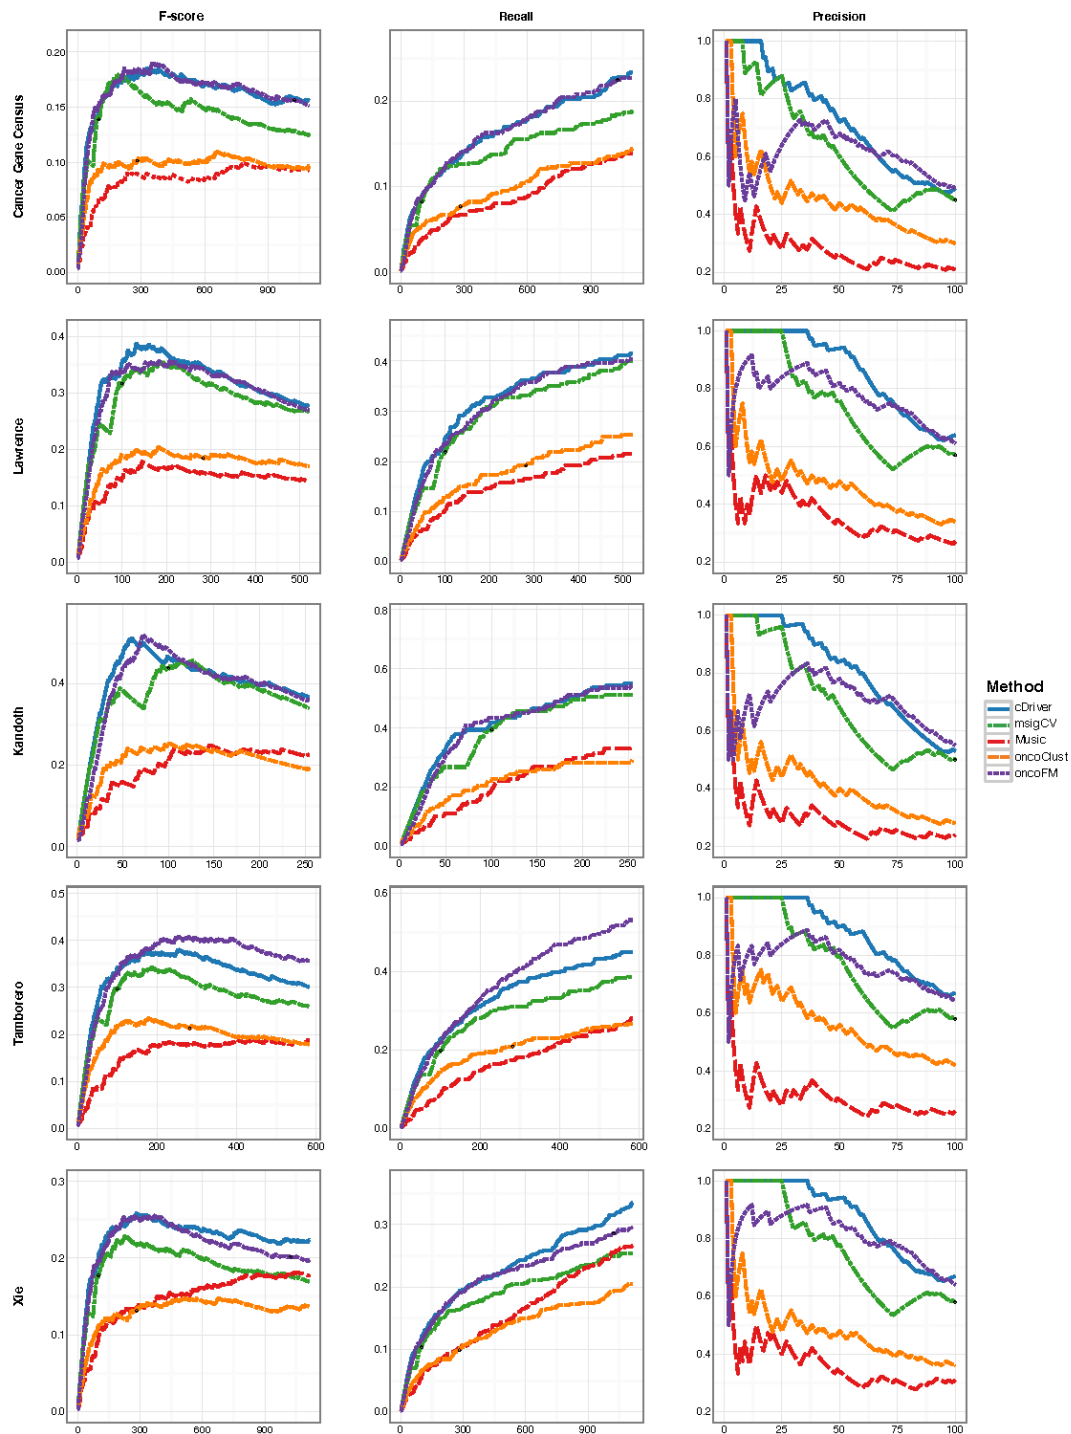

**Supplementary Figure 4.**

**Evaluation of several measures for five driver identification methods benchmarked on Pancan12.** Benchmarking of F-score, precision, and recall measures for five driver identification methods benchmarked on Pancan12 across five gold standard datasets<sup>1,2,3,4,5</sup>. X-axis shows the ranked list of genes for each tool. Y-axis shows F-score, Precision, and Recall according to the header.

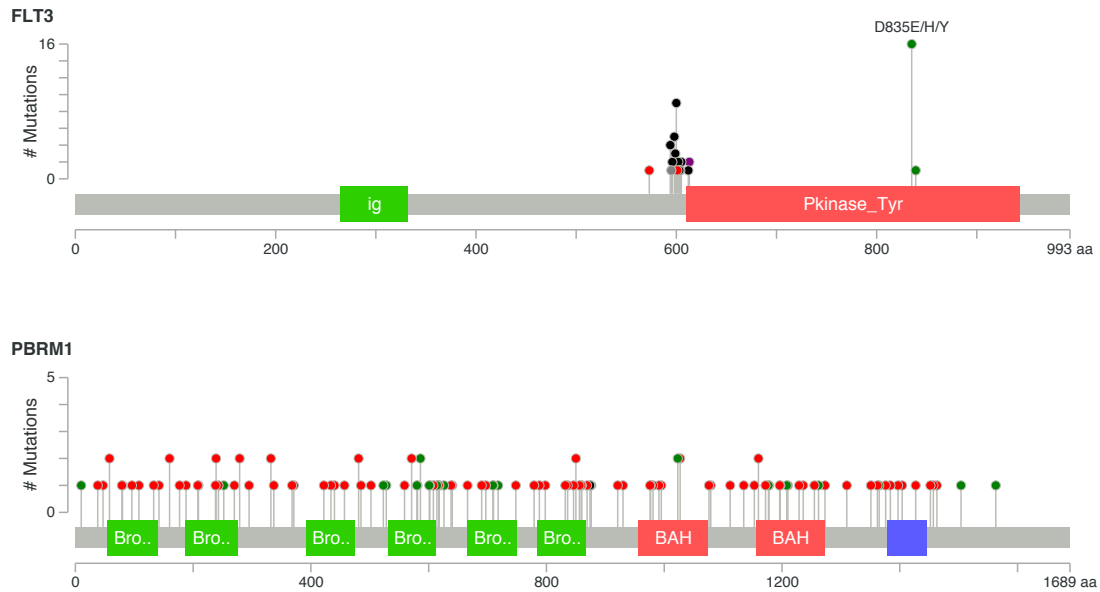

### Supplementary Figure 5

**Somatic mutations in *FLT3* and *PBRM1*.** Two examples of driver genes missed by methods using a single signature of tumor evolution. Somatic mutations in *FLT3* and *PBRM1* in Pancan12 are visualized as lollipop plots. *FLT3* has a recurrent mutation in position 835 that is scored as medium damage by MutationAssesor and hence is missed by the functional damage bias-based method OncodriveFM. *PBRM1* has loss of function somatic mutations distributed along multiple domains of the gene and is missed by the clustering based method OncodriveClust. Red dots represent nonsynonymous mutations, green represents nonsense mutations, and black represents one base pair indel mutations. Figure was made using mutationmapper<sup>6</sup>.

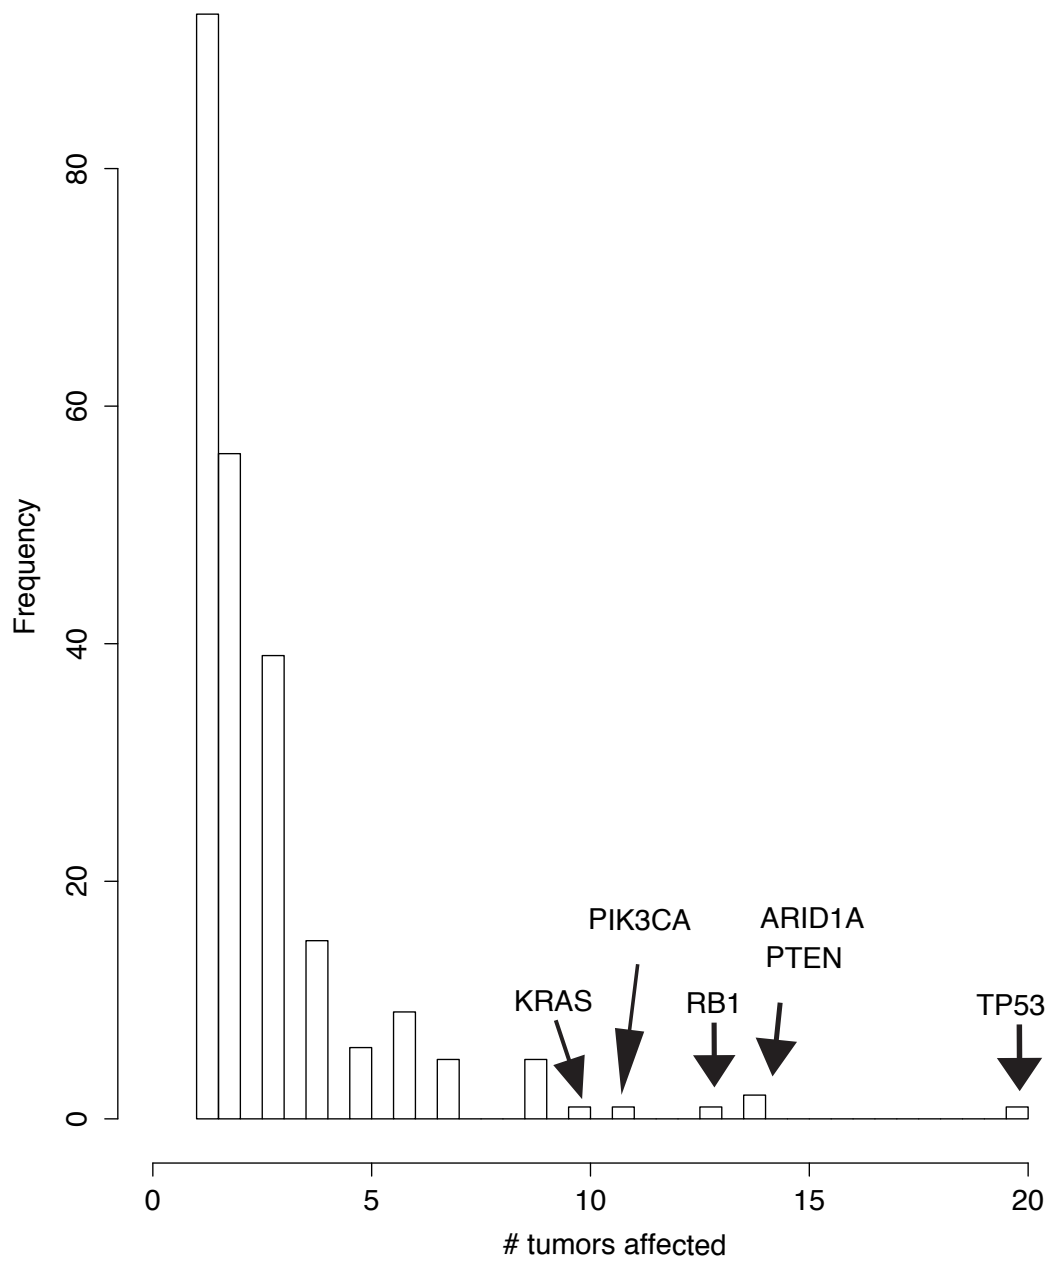

**Supplementary Figure 6**

**Distribution of genes affecting tumor types.** Histogram of high confidence driver genes and the number of tumor types affected by them.

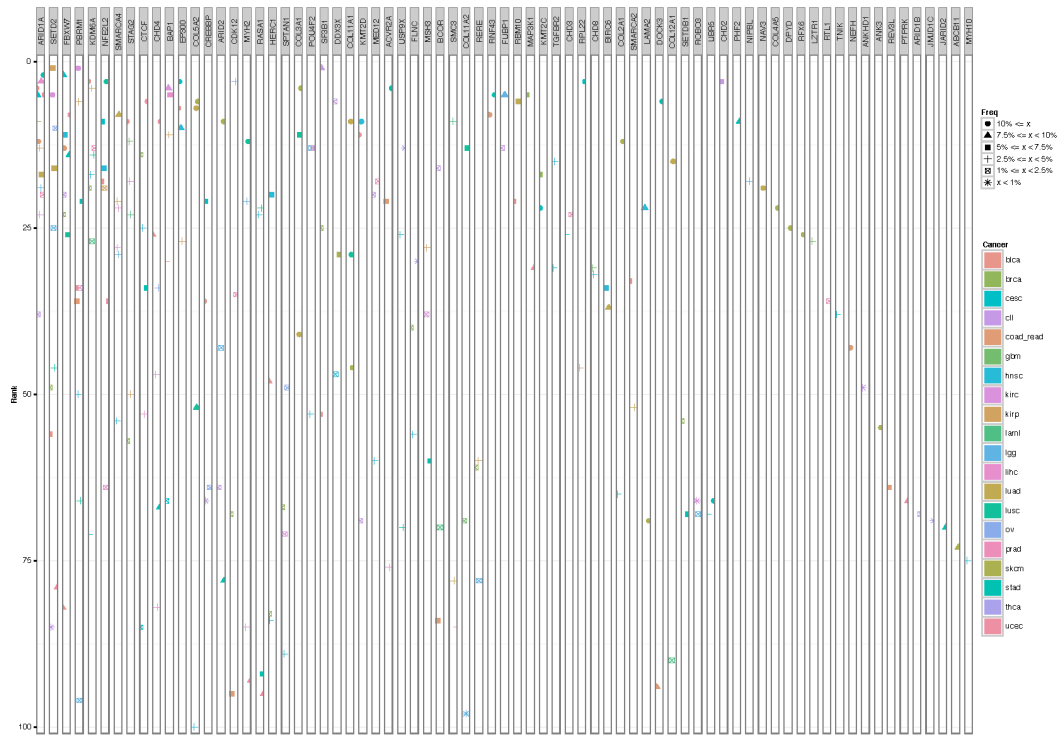

**Supplementary Figure 7**

**Extended figure of the “tumor type – driver gene” connection landscape.** Thirty selected genes are shown together with the tumors affected by them, the ranking in that tumor type, and the frequency of patients having the gene mutated.



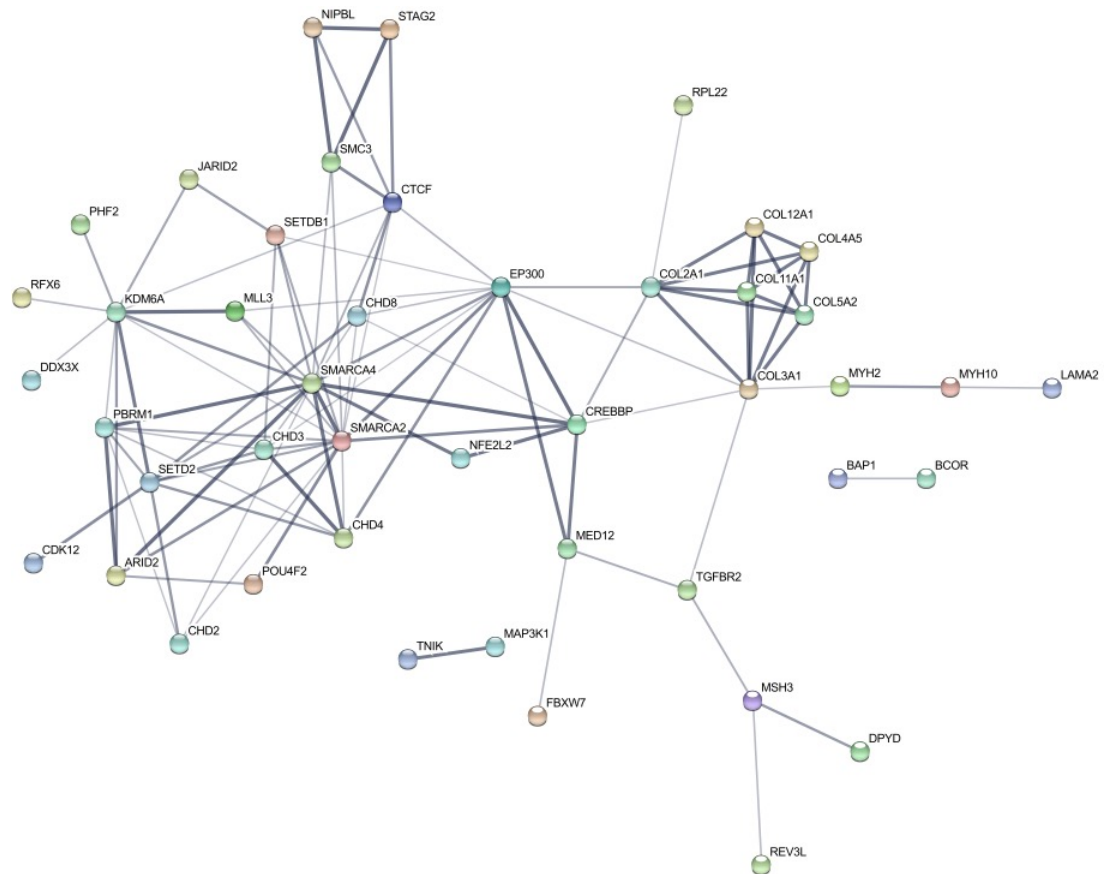

**Supplementary Figure 8**

**STRING PPI analysis of selected genes.** STRING enrichment analysis using all functions except text mining shows a significant enrichment for interactions in the unreported TTDG dataset. The main function revealed in these genes is chromatin modification.

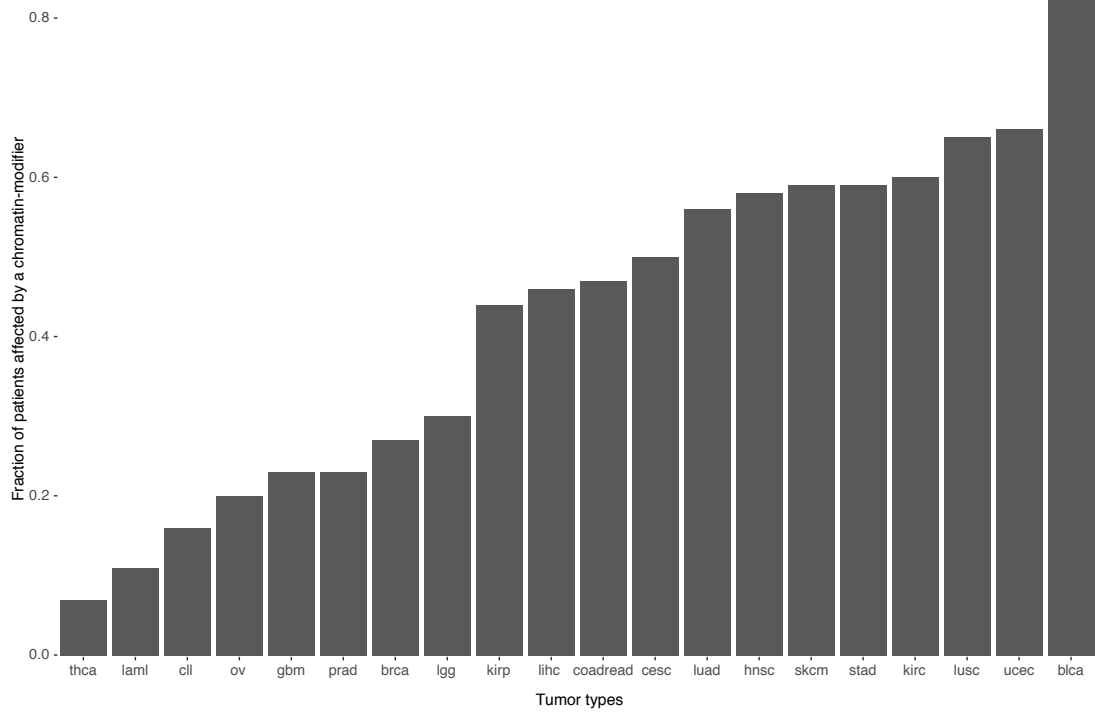

### Supplementary Figure 9

**Chromatin modifiers affect a large proportion of individuals with cancer.** Proportion of individuals harboring a nonsilent mutation in at least one of the novel chromatin modifiers described in the text.

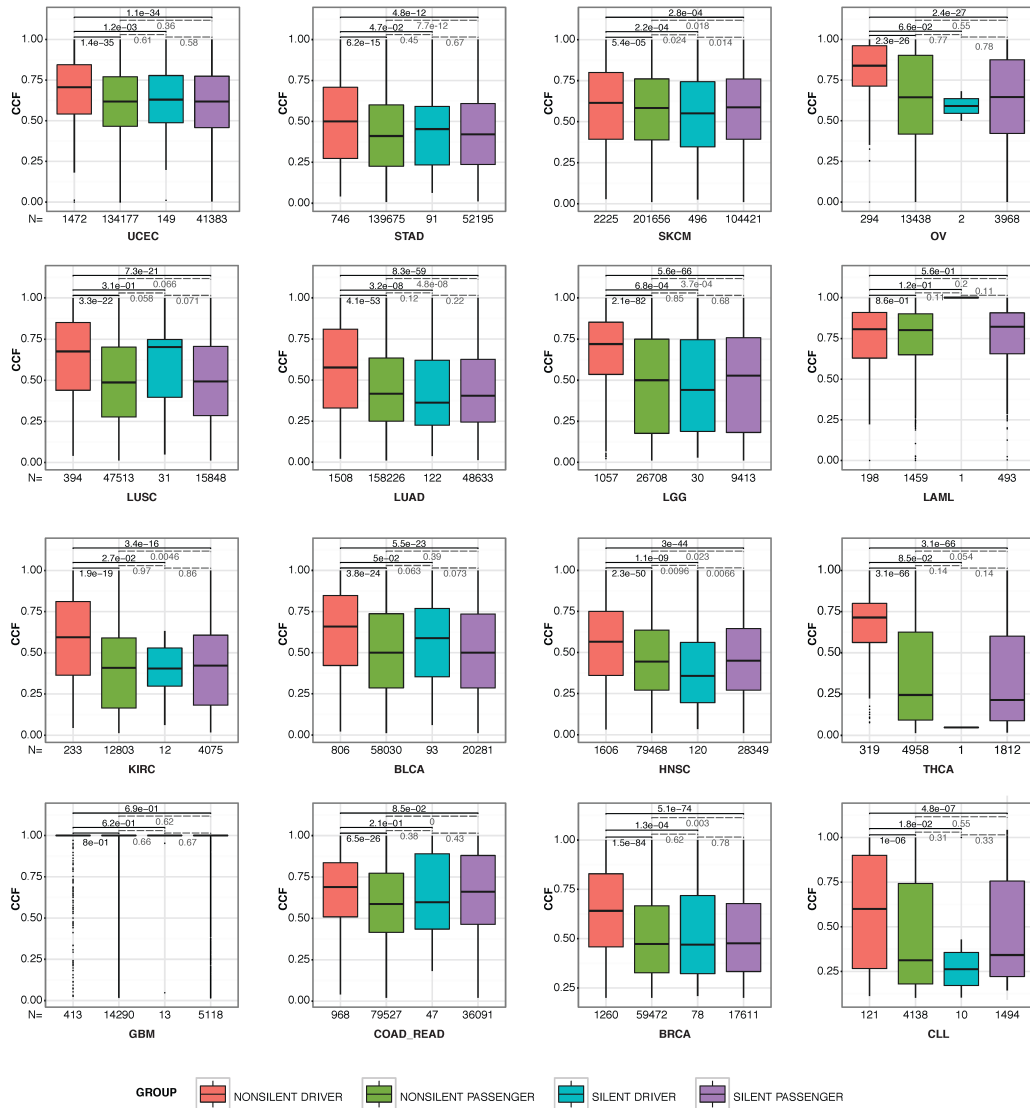

**Supplementary Figure 10**

**CCF distribution of somatic mutations for multiple tumor types.** The distribution of CCF values for nonsilent and silent driver mutations and for nonsilent and silent passenger mutations. The P-values shown represent the Wilcoxon-MannWhitney statistical test. The x-axis shows the number of variants used to calculate each distribution, the y-axis shows the CCF.

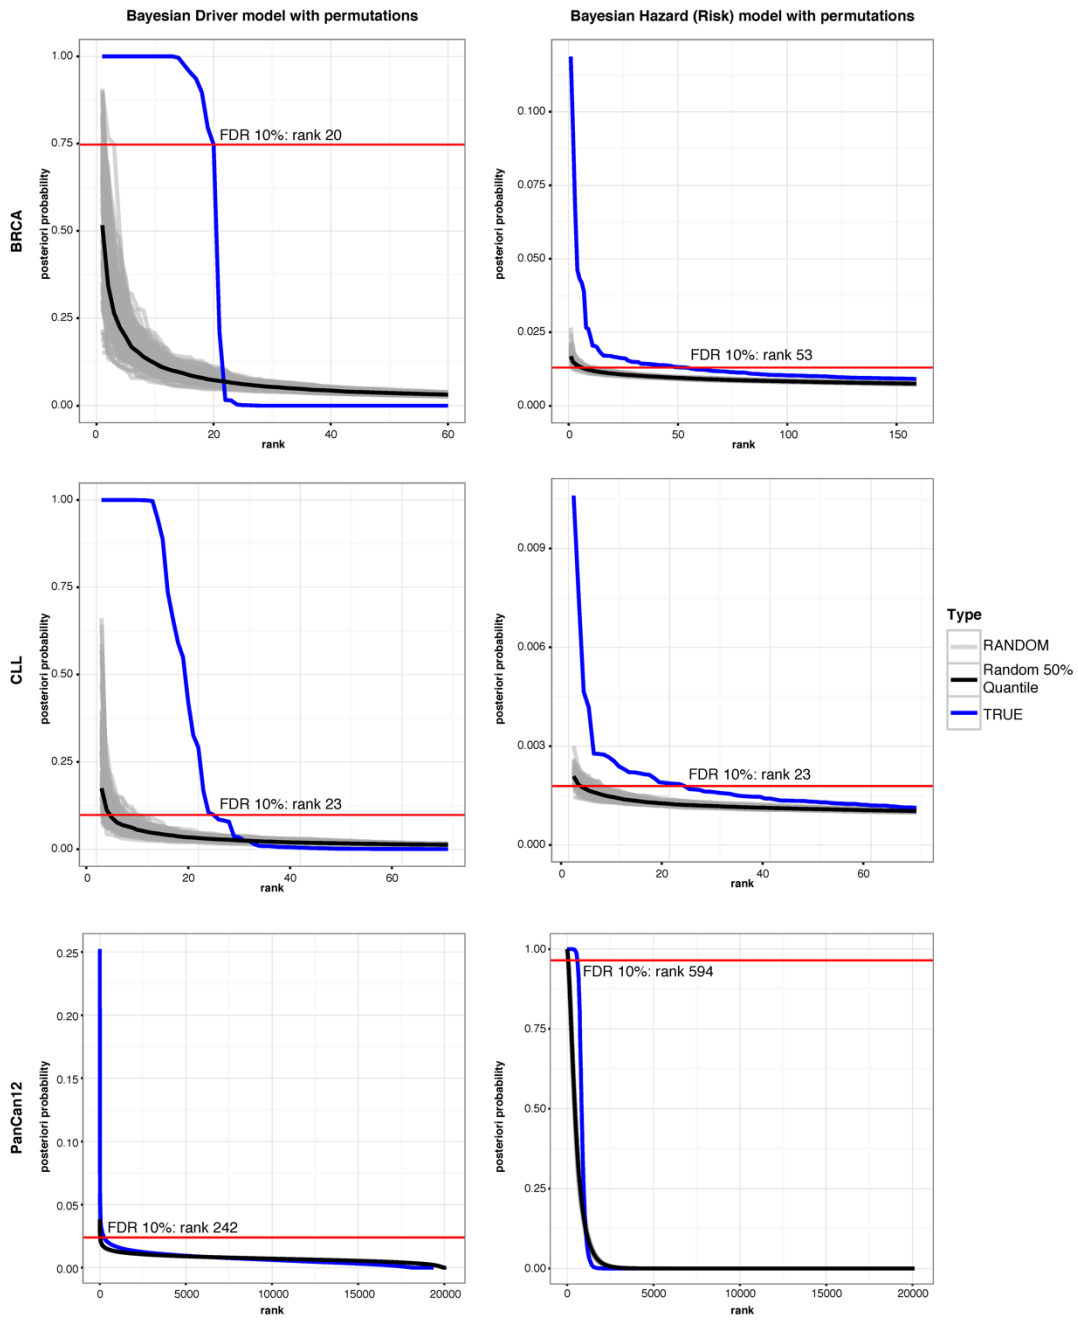

**Supplementary Figure 11**

**Cut off selection for BRCA, CLL, and PanCan12.** A randomization procedure reflects the behavior of the posterior probabilities for both cDriver Bayesian models under the null/background model. We obtained a rank cut off where the false discovery rate is less than 10% by comparing test versus null case.

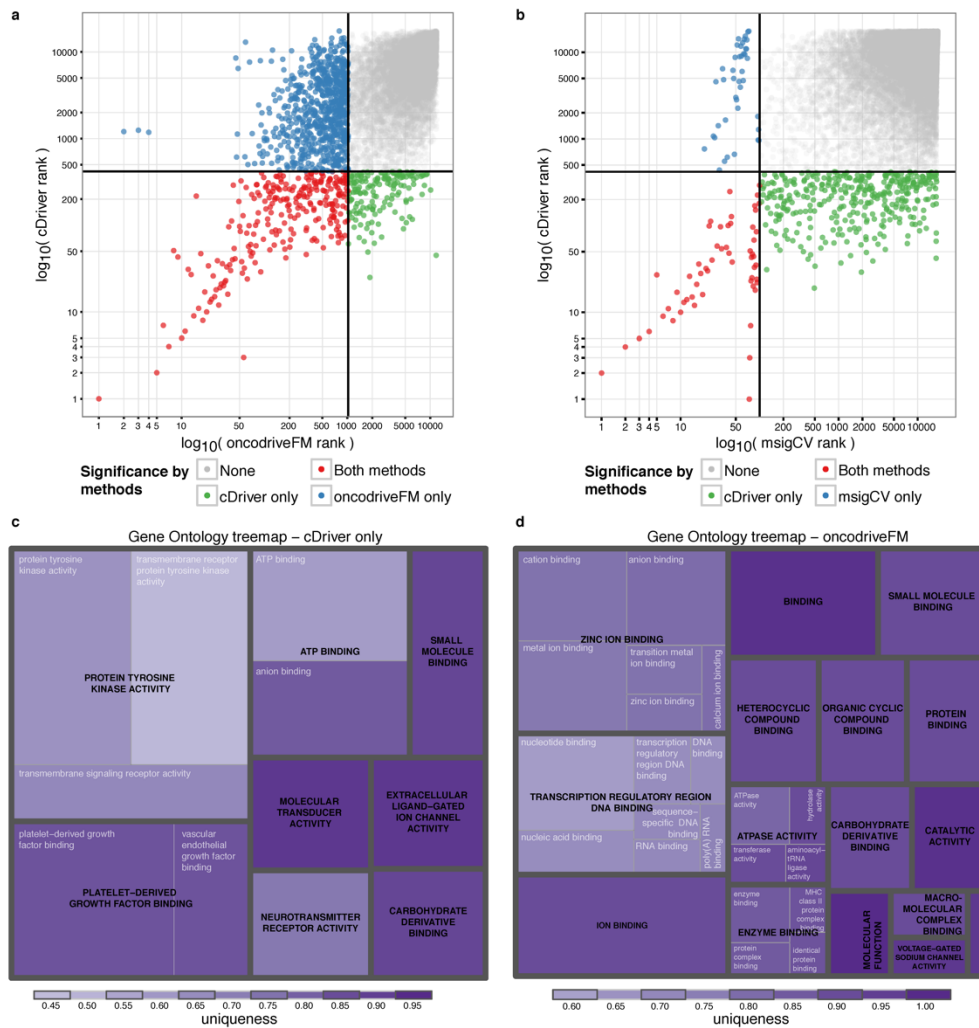

## Supplementary Figure 12

**Rank-rank plot for cDriver, mutsigCV, and oncdriveFM.** a) Rank-rank plot in logarithmic scale for cDriver versus oncdriveFM. b) Rank-rank plot in logarithmic scale for cDriver versus mutsigCV. c) Treemap of functional enrichment of GO terms (molecular function) for significant genes identified only by cDriver (CCF). d) Treemap of functional enrichment of GO terms (molecular function) for significant genes identified only by oncdriveFM. genes identified by mutsigCV only do not show a significant enrichment.

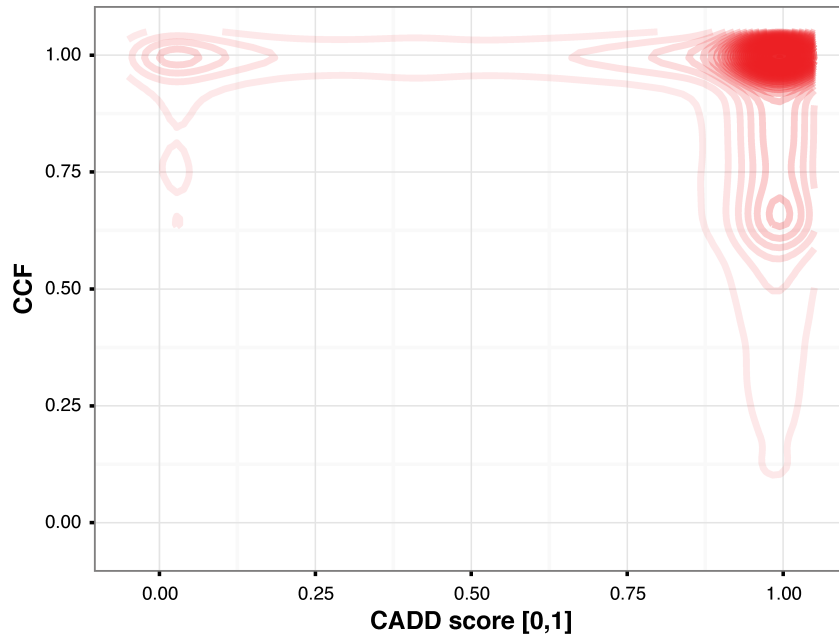

**Supplementary Figure 13**

Distribution of CCF and functional impact score (CADD) for the genes considered as drivers in at least one of the five gold standards used throughout the manuscript. If a gene in one sample has two mutations, maximum values for both scores are plotted.

## Supplementary Tables

**Supplementary Table 1. High quality datasets for benchmarking**

| Abbreviation     | Tumor type                   | # Patients | Nonsilent | Silent | Incidence | Source             | # Gold standard genes |
|------------------|------------------------------|------------|-----------|--------|-----------|--------------------|-----------------------|
| <b>BRCA</b>      | Breast invasive carcinoma    | 762        | 29929     | 8612   | 0,00125   | Kandoth et al 2012 | 33                    |
| <b>CLL</b>       | Chronic Lymphocytic Leukemia | 385        | 8145      | 3015   | 0,00005   | ICGC               | 22                    |
| <b>Pancan12*</b> | Pooled set of 12 cancers     | 3205       | 291129    | 90884  | 0,00450   | Kandoth et al 2012 | *CGC                  |

**Supplementary Table 2. Manually curated gold standard genes for BRCA and CLL**

| <b>BRCA</b> | <b>CLL</b> |
|-------------|------------|
| AKT1        | ATM        |
| APC         | BCOR       |
| ARID1A      | BRAF       |
| ATM         | CHD2       |
| BRCA1       | DDX3X      |
| BRCA2       | EGR2       |
| BRIP1       | FBXW7      |
| CASP8       | ITPKB      |
| CBFB        | KLHL6      |
| CCND1       | KRAS       |
| CDH1        | MED12      |
| CDKN1B      | MYD88      |
| CTCF        | NOTCH1     |
| ERBB2       | NRAS       |
| FOXA1       | POT1       |
| GATA3       | SAMHD1     |
| KMT2A       | SF3B1      |
| KMT2C       | TP53       |
| MAP2K4      | XPO1       |
| MAP3K1      | ZMYM3      |
| MYB         | BIRC3      |
| NCOR1       | MYC        |
| NF1         |            |
| PALB2       |            |
| PIK3CA      |            |
| PIK3R1      |            |
| PTEN        |            |
| RB1         |            |
| RUNX1       |            |
| SF3B1       |            |
| TBL1XR1     |            |
| TBX3        |            |
| TP53        |            |

**Supplementary Table 3. F-score, Precision, and Recall at significance level for each gold standard**

| Method                                     | Significance level position | F-score at significance level | Precision at significance level | Recall at significance level | Max F-score | Max F-score position |
|--------------------------------------------|-----------------------------|-------------------------------|---------------------------------|------------------------------|-------------|----------------------|
| <b>CGC gold standard (547 genes)</b>       |                             |                               |                                 |                              |             |                      |
| cDriver <sup>*#@</sup>                     | 418                         | 0.1803                        | 0.2081                          | 0.159                        | 0.1854      | 327                  |
| msigCV                                     | 100                         | 0.1391                        | 0.45                            | 0.0823                       | 0.1806      | 184                  |
| Music                                      | 2175                        | 0.0794                        | 0.0497                          | 0.1974                       | 0.0985      | 793                  |
| oncoClust                                  | 282                         | 0.1013                        | 0.1489                          | 0.0768                       | 0.1094      | 660                  |
| oncoFM                                     | 1025                        | 0.1565                        | 0.12                            | 0.2249                       | 0.1911      | 353                  |
| <b>Tamborero gold standard (291 genes)</b> |                             |                               |                                 |                              |             |                      |
| cDriver <sup>*#@</sup>                     | 418                         | 0.3357                        | 0.2847                          | 0.4089                       | 0.3796      | 257                  |
| msigCV                                     | 100                         | 0.2967                        | 0.58                            | 0.1993                       | 0.3424      | 188                  |
| Music                                      | 2175                        | 0.1233                        | 0.0699                          | 0.5223                       | 0.1987      | 806                  |
| oncoClust <sup>*</sup>                     | 282                         | 0.2129                        | 0.2163                          | 0.2096                       | 0.2345      | 178                  |
| oncoFM                                     | 1025                        | 0.272                         | 0.1746                          | 0.6151                       | 0.4073      | 254                  |
| <b>Kandath gold standard (127 genes)</b>   |                             |                               |                                 |                              |             |                      |
| cDriver                                    | 418                         | 0.2936                        | 0.1914                          | 0.6299                       | 0.5134      | 60                   |
| msigCV <sup>#</sup>                        | 100                         | 0.4405                        | 0.5                             | 0.3937                       | 0.4585      | 126                  |
| Music                                      | 2175                        | 0.0999                        | 0.0529                          | 0.9055                       | 0.25        | 145                  |
| oncoClust                                  | 282                         | 0.1858                        | 0.1348                          | 0.2992                       | 0.2533      | 102                  |
| oncoFM <sup>@</sup>                        | 1025                        | 0.15102                       | 0.0849                          | 0.685                        | 0.5226      | 72                   |
| <b>Lawrence gold standard (260 genes)</b>  |                             |                               |                                 |                              |             |                      |
| cDriver <sup>@</sup>                       | 418                         | 0.3009                        | 0.244                           | 0.3923                       | 0.3878      | 132                  |
| msigCV <sup>#</sup>                        | 100                         | 0.3167                        | 0.57                            | 0.2192                       | 0.3571      | 188                  |
| Music                                      | 2175                        | 0.0986                        | 0.0552                          | 0.4615                       | 0.1778      | 145                  |
| oncoClust <sup>*</sup>                     | 282                         | 0.1845                        | 0.1773                          | 0.1923                       | 0.2045      | 180                  |
| oncoFM                                     | 1025                        | 0.193                         | 0.121                           | 0.4769                       | 0.3567      | 183                  |
| <b>Xie gold standard (556 genes)</b>       |                             |                               |                                 |                              |             |                      |
| cDriver <sup>*#@</sup>                     | 418                         | 0.2444                        | 0.2847                          | 0.214                        | 0.2578      | 282                  |
| msigCV                                     | 100                         | 0.1768                        | 0.58                            | 0.1043                       | 0.2296      | 228                  |
| Music                                      | 2175                        | 0.1399                        | 0.0878                          | 0.3435                       | 0.1814      | 1054                 |
| oncoClust                                  | 282                         | 0.1313                        | 0.195                           | 0.0989                       | 0.1477      | 676                  |
| oncoFM                                     | 1025                        | 0.2011                        | 0.1551                          | 0.286                        | 0.2549      | 370                  |

\* - best abs(Max F-score – F-score at significance level)

# - best F-score at significance level

@ - best maximum F-score

**Supplementary Table 6. Number of significant genes per tumor type under FDR10%**

| Tumor type | Genes |
|------------|-------|
| blca       | 29    |
| brca       | 33    |
| cesc       | 74    |
| cbl        | 22    |
| coad_read  | 107   |
| gbm        | 42    |
| hnsc       | 27    |
| kirc       | 19    |



|             |     |
|-------------|-----|
| <b>kirp</b> | 34  |
| <b>laml</b> | 23  |
| <b>lgg</b>  | 17  |
| <b>lihc</b> | 54  |
| <b>luad</b> | 38  |
| <b>lusc</b> | 24  |
| <b>ov</b>   | 5   |
| <b>prad</b> | 51  |
| <b>skcm</b> | 84  |
| <b>stad</b> | 151 |
| <b>thca</b> | 3   |
| <b>ucec</b> | 22  |

1. Kandoth, C., et al. Mutational landscape and significance across 12 major cancer types. *Nature* **502**, 333-9 (2013).doi:10.1038/nature12634
2. Lawrence, M. S., et al. Discovery and saturation analysis of cancer genes across 21 tumour types. *Nature* **505**, 495-501 (2014).doi:10.1038/nature12912
3. Tamborero, D., Gonzalez-Perez, A. and Lopez-Bigas, N. OncodriveCLUST: exploiting the positional clustering of somatic mutations to identify cancer genes. *Bioinformatics* **29**, 2238-2244 (2013).
4. Futreal, P. A., et al. A census of human cancer genes. *Nat Rev Cancer* **4**, 177-83 (2004).doi:10.1038/nrc1299
5. Xie, M., et al. Age-related mutations associated with clonal hematopoietic expansion and malignancies. *Nat Med* **20**, 1472-8 (2014).doi:10.1038/nm.3733
6. Vohra, S. and Biggin, P. C. Mutationmapper: a tool to aid the mapping of protein mutation data. *PLoS One* **8**, e71711 (2013).doi:10.1371/journal.pone.0071711
